1 **Structural basis for capsid recruitment and coat formation during HSV-1 nuclear egress**

2

3 Elizabeth B. Draganova<sup>1</sup>, Jiayan Zhang<sup>2,3,4</sup>, Z. Hong Zhou<sup>2,3,4</sup>, and Ekaterina E. Heldwein<sup>1,#</sup>

4

5 <sup>1</sup>Department of Molecular Biology and Microbiology, Tufts University School of Medicine,  
6 Boston, MA, 02111, USA

7 <sup>2</sup>Department of Microbiology, Immunology & Molecular Genetics, University of California, Los  
8 Angeles (UCLA), Los Angeles, California, 90095, USA

9 <sup>3</sup>Molecular Biology Institute, UCLA, Los Angeles, California, 90095, USA

10 <sup>4</sup>California NanoSystems Institute, UCLA, Los Angeles, California, 90095, USA

11

12 <sup>#</sup>Correspondence: Ekaterina Heldwein, Tufts University School of Medicine, 136 Harrison  
13 Avenue, Boston, MA 02111; 617-636-0858; [katya.heldwein@tufts.edu](mailto:katya.heldwein@tufts.edu)

14

15 **Keywords:** HSV-1, herpesvirus, nuclear egress, nuclear egress complex, NEC, membrane  
16 budding, capsid budding

17

18 **Abstract**

19 During herpesvirus infection, egress of nascent viral capsids from the nucleus is mediated by the  
20 viral nuclear egress complex (NEC). NEC deforms the inner nuclear membrane (INM) around  
21 the capsid by forming a hexagonal array. However, how the NEC coat interacts with the capsid  
22 and how curved coats are generated to enable budding is yet unclear. Here, by structure-guided  
23 truncations, confocal microscopy, and cryoelectron tomography, we show that binding of the  
24 capsid protein UL25 promotes the formation of NEC pentagons rather than hexagons. We  
25 hypothesize that during nuclear budding, binding of UL25 situated at the pentagonal capsid  
26 vertices to the NEC at the INM promotes formation of NEC pentagons that would anchor the  
27 NEC coat to the capsid. Incorporation of NEC pentagons at the points of contact with the  
28 vertices would also promote assembly of the curved hexagonal NEC coat around the capsid,  
29 leading to productive egress of UL25-decorated capsids.

30

31 To replicate, all viruses must assemble their progeny virions and release them from the cell while  
32 overcoming many obstacles, including cellular compartmentalization. Viruses are thus experts at  
33 hijacking, manipulating, and, sometimes, even remodeling cellular architecture during viral  
34 morphogenesis and egress. Identifying and understanding the unique aspects of virus-induced  
35 cellular remodeling could unveil targets for therapeutic intervention; yet, we are only beginning  
36 to understand the mechanisms behind many of these processes.

37 One prominent example of virus-induced remodeling of cellular architecture can be  
38 observed during egress of herpesviruses – enveloped, double-stranded DNA viruses that infect a  
39 wide range of hosts, from mollusks to humans. All herpesviruses can establish lifelong, latent  
40 infections within the host, from which they can periodically reactivate, spreading to uninfected  
41 tissues and hosts and causing a number of ailments. When the virus actively replicates during a  
42 primary infection or reactivation of a latent infection, the progeny virions are assembled and  
43 released from the cell in a process termed egress whereby herpesvirus capsids traverse cellular  
44 membranes twice [reviewed in (Johnson and Baines 2011, Bigalke and Heldwein 2016, Roller  
45 and Baines 2017)]. First, nuclear capsids bud at the inner nuclear membrane (INM) forming  
46 enveloped vesicles that pinch off into the perinuclear space. These perinuclear viral particles fuse  
47 with the outer nuclear membrane, which releases the capsids into the cytosol. Cytoplasmic  
48 capsids then bud again at vesicles derived from the *trans*-Golgi network and early endosomes  
49 [reviewed in (Johnson and Baines 2011)] to form mature, infectious virions that are released  
50 from the cell by exocytosis. Whereas many enveloped viruses acquire their lipid envelopes by  
51 budding at the cytoplasmic membranes or the plasma membrane, herpesviruses are unusual  
52 among vertebrate viruses in their ability to bud at the nuclear envelope (Bigalke and Heldwein  
53 2016).

54 Capsid budding at the nuclear envelope requires two conserved herpesviral proteins, which  
55 are named UL31 and UL34 in herpes simplex virus type 1 (HSV-1), that form the nuclear egress  
56 complex (NEC) [reviewed in (Mettenleiter et al. 2013, Bigalke and Heldwein 2016, Bigalke and  
57 Heldwein 2017)]. The NEC heterodimer is anchored at the INM through the single C-terminal  
58 transmembrane helix of UL34 and faces the nucleoplasm (Shiba et al. 2000). UL31 is a nuclear  
59 phosphoprotein that colocalizes with UL34 (Chang and Roizman 1993, Reynolds et al. 2001)  
60 and interacts with the capsid during nuclear egress (Trus et al. 2007, Yang and Baines 2011).  
61 Both UL31 and UL34 are necessary for efficient nuclear egress, and in the absence of either  
62 protein, capsids accumulate in the nucleus and viral replication is reduced by several orders of  
63 magnitude (Roller et al. 2000, Fuchs et al. 2002).

64 Previously, we discovered that HSV-1 NEC has an intrinsic ability to deform and bud  
65 membranes by demonstrating that purified recombinant NEC vesiculates synthetic lipid bilayers  
66 *in vitro* without any additional factors or chemical energy (Bigalke et al. 2014). Similar findings  
67 were reported with the NEC homolog from a closely related pseudorabies virus (PRV) (Lorenz et  
68 al. 2015). Using cryogenic electron microscopy and tomography (cryoEM/ET), we showed that  
69 the NEC forms hexagonal “honeycomb” coats on the inner surface of budded vesicles formed *in*  
70 *vitro* (Bigalke et al. 2014). Very similar hexagonal coats were observed in capsidless perinuclear  
71 vesicles formed *in vivo*, in uninfected cells expressing PRV NEC (Hagen et al. 2015).  
72 Additionally, HSV-1 NEC formed a hexagonal lattice of the same dimensions in crystals  
73 (Bigalke and Heldwein 2015). The high-resolution crystal structure of the hexagonal NEC lattice  
74 revealed interactions at the lattice interfaces (Bigalke and Heldwein 2015), and subsequent work  
75 confirmed that mutations that disrupt oligomeric interfaces reduce budding *in vitro* (Bigalke et  
76 al. 2014, Bigalke and Heldwein 2015) and *in vivo* (Roller et al. 2010, Ariei et al. 2019).

77 Collectively, these findings established the NEC as a viral budding machine that generates  
78 negative membrane curvature by oligomerizing into a hexagonal coat on the surface of the  
79 membrane.

80 What remains unclear, however, is how the NEC achieves appropriate coat geometry  
81 compatible with negative membrane curvature formation during budding. A purely hexagonal  
82 arrangement is flat, so curvature is typically achieved either by insertions of pentagons as found  
83 at 12 vertices of an icosahedron (Zandi et al. 2004), or by inclusion of irregular defects as  
84 observed in several viral coats (Heuser 2005, Briggs et al. 2009, Hyun et al. 2011, Schur et al.  
85 2015). It is tempting to speculate that the capsid geometry may influence the geometry of the  
86 NEC coat. In perinuclear viral particles visualized in infected cells, the NEC coats appear to be  
87 tightly associated with the capsid (Hagen et al. 2015). Capsid interactions with the NEC during  
88 nuclear budding may be mediated by binding of the capsid protein UL25 to UL31 (Yang and  
89 Baines 2011, Yang et al. 2014). Moreover, UL25 forms pentagonal complexes at the vertices of  
90 the icosahedral herpesvirus capsids (Furlong 1978, Dai and Zhou 2018). However, it is unknown  
91 whether interaction with a mature capsid could promote pentagonal formation within NEC coats  
92 and if so, how the NEC coat would be arranged around the capsid.

93 A fortuitous observation that HSV-1 UL25, a capsid protein that decorates the vertices, co-  
94 localizes with synthetic liposomes *in vitro* in the presence of the NEC prompted us to investigate  
95 interactions between UL25 and NEC and the effect of UL25 on NEC-mediated budding *in vitro*.  
96 Here, by confocal microscopy, we show that free UL25 (i.e., not on capsid vertices) inhibits  
97 NEC-mediated budding *in vitro*. 3D visualization of the molecular architecture by cryoET  
98 further reveals that free UL25 forms a net of interconnected five-pointed stars on top of  
99 membrane-bound NEC layer that may block budding by preventing membrane-bound NEC coats

100 from undergoing conformational changes required for budding. We also found that the NEC  
101 forms an alternative pentagonal, rather than hexagonal, arrangement when bound to the UL25,  
102 and that this phenomenon requires residues 45-73 that form the UL25/UL25 helical bundles on  
103 the native capsids. We hypothesize that during nuclear budding, NEC pentagons formed at the  
104 points of contact with the capsid vertices both help anchor the NEC coat to the capsid and  
105 generate appropriate coat curvature through the inclusion of pentagons into a hexagonal coat as it  
106 assembles around the capsid. This mechanism would ensure successful budding and egress of the  
107 UL25-decorated viral capsid.

108

## 109 **RESULTS**

110 ***Generation of UL25 variants.*** HSV-1 UL25 can be expressed in soluble form in *E. coli* only  
111 when residues 1-44 are deleted (Bowman et al. 2006). Residues 1-50 are necessary and sufficient  
112 for capsid binding (Cockrell et al. 2009), and in the cryoEM structure of the HSV-1 capsid, these  
113 residues mediate extensive interactions with another capsid protein, UL17 (Dai and Zhou 2018).  
114 This suggests that these residues are likely disordered in free UL25, potentially leading to  
115 aggregation and poor solubility. Therefore, we generated and expressed an HSV-1 UL25 $\Delta$ 44  
116 construct, which lacks residues 1-44. UL25 $\Delta$ 44 was soluble and could be purified, in agreement  
117 with the previous report (Bowman et al. 2006), but was proteolytically cleaved during  
118 purification despite the presence of protease inhibitors (Fig. 1b). N-terminal sequencing (data not  
119 shown) of the cleavage product revealed that UL25 $\Delta$ 44 was cut between residues Q72 and A73.  
120 To prevent heterogeneity due to cleavage, we generated two constructs: UL25 $\Delta$ 44 Q72A, which  
121 has a single point mutation that should eliminate the cleavage site, and UL25 $\Delta$ 73, which

122 corresponds to the cleavage product. Both constructs yielded a single UL25 species after  
123 purification (Fig. 1b).

124

125 ***UL25 $\Delta$ 44 Q72A inhibits NEC-mediated budding.*** To assess the effect of UL25 on NEC-  
126 mediated budding, we used an established *in-vitro* budding assay utilizing recombinant, soluble  
127 NEC220 (full-length UL31 and UL34 residues 1-220), fluorescently labelled giant unilamellar  
128 vesicles (GUVs), and membrane-impermeable fluorescent dye, Cascade Blue (Bigalke et al.  
129 2014). NEC220 and UL25 $\Delta$ 44 Q72A were added to the GUVs in 1:1, 1:6, 1:8, 1:10, or 1:20  
130 molar ratios, and budding events were quantified. UL25 $\Delta$ 44 Q72A inhibited NEC-mediated  
131 budding in a dose-dependent manner, and at 1:10 or 1:20 NEC:UL25 molar ratios, few budding  
132 events were observed (Fig. 1c). By contrast, UL25 $\Delta$ 73 did not inhibit budding even at a 1:20  
133 ratio of NEC:UL25 (Fig. 1c), which suggested that residues 45-73 were necessary for inhibition.

134 UL25 $\Delta$ 44 consists of a long N-terminal  $\alpha$ -helix (residues 48-94), followed by a flexible  
135 linker unresolved in the cryoEM structure, and a C-terminal globular core (residues 134-580)  
136 (Fig. 1a). Residues 45-73 encompass the N-terminal half of the long  $\alpha$ -helix. To further narrow  
137 down the inhibitory region within UL25, we analyzed its sequence conservation. Sequence  
138 alignment of UL25 homologs from five alphaherpesviruses revealed a divergent N terminus  
139 followed by a highly conserved alanine-rich region, residues 61-69 (Fig. 1a). We generated the  
140 UL25 $\Delta$ 58 Q72A construct lacking the divergent N terminus of the  $\alpha$ -helix (Fig. 1b). UL25 $\Delta$ 58  
141 Q72A did not inhibit NEC220 budding (Fig. 1c). We also generated a UL25 $\Delta$ 50 Q72A construct  
142 (as a control for studies using eGFP-UL25 chimera described below), which inhibited budding at  
143 a 1:10 NEC:UL25 ratio, the minimal UL25 concentration for budding inhibition (Fig. 2a). Thus,  
144 residues 51-73 appear essential for inhibition whereas residues 45-50 are dispensable.

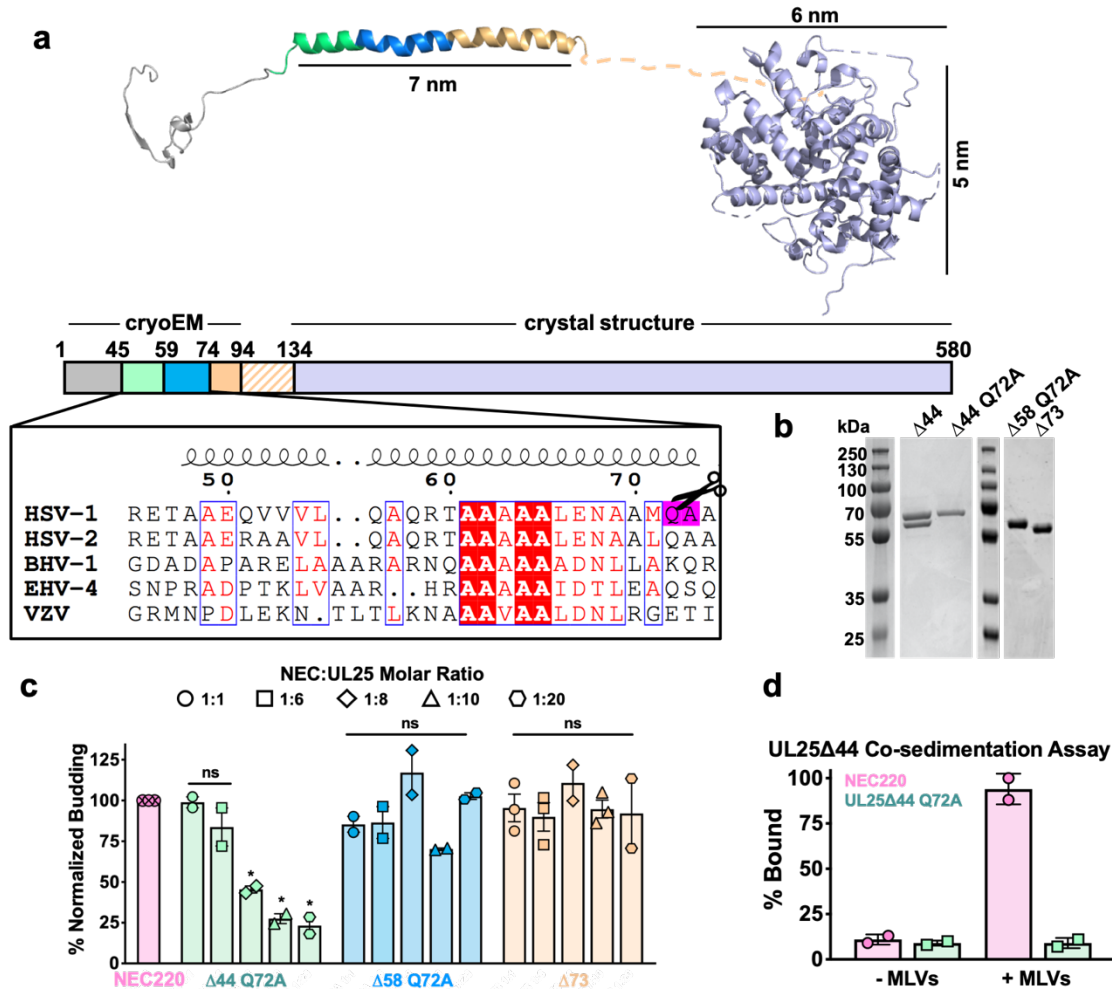

145

146 **Fig. 1. Inhibition of NEC-mediated budding by UL25 constructs.** a) The UL25 structure and a  
 147 diagram of domain organization is shown along with a multiple sequence alignment of UL25 residues 45-  
 148 74 from five alphaherpesviruses. Sequence alignment was generated using Clustal Omega<sup>45</sup> and displayed  
 149 using ESPrpt 3.0<sup>46</sup>. Identical residues are shown as white letters on a red background. Similar residues  
 150 are shown as red letters in a blue box. Secondary structure derived from the cryoEM reconstruction of  
 151 HSV-1 UL25 is shown above the alignment. The following herpesvirus sequences were used (GenBank  
 152 GeneID numbers in parentheses): HSV-1, herpes simplex virus type 1, strain 17 (2703377); HSV-2,  
 153 herpes simplex virus type 2, strain HG52 (1487309); BHV-1, bovine herpesvirus-1 (4783418); EHV-4,  
 154 equine herpesvirus-4, strain NS80567 (1487602); and VZV, varicella-zoster virus, strain Dumas  
 155 (1487687). b) SDS-PAGE of purified UL25 constructs: UL25Δ44 (cleaved product; 57 kDa), UL25Δ44  
 156 Q72A (single product; 57 kDa), UL25Δ58 Q72A (56 kDa) and UL25Δ73 (54 kDa). c) UL25Δ44 Q72A  
 157 inhibits NEC budding whereas other UL25 constructs do not. For each condition, NEC-mediated budding  
 158 was tested at 1:1, 1:6, 1:8, 1:10, and 1:20 NEC:UL25 molar ratios. Each construct was tested in at least  
 159 two biological replicates, consisting of three technical replicates. Symbols show average budding  
 160 efficiency of each biological replicate relative to NEC220 (100%; pink). Error bars represent the standard  
 161 error of measurement for at least two individual experiments. Significance compared to NEC220 was  
 162 calculated using an unpaired t-test against NEC220. \*P-value < 0.1. d) UL25Δ44 Q72A does not bind to  
 163 acidic lipid membranes.



164 ***UL25 does not bind synthetic membranes.*** We first tested whether UL25 inhibited NEC-  
165 mediated budding by competing with the NEC for binding to membranes. We utilized an  
166 established co-sedimentation assay utilizing multilamellar vesicles (MLVs) of the same  
167 composition as the GUVs used in the budding assay (Bigalke et al. 2014). Unlike NEC220,  
168 UL25 $\Delta$ 44 Q72A did not bind synthetic lipid vesicles (Fig. 1d) and, therefore, could not compete  
169 with the NEC220 for binding to membranes.

170  
171 ***UL25 $\Delta$ 44 and NEC do not interact in solution.*** UL25 does not bind membranes (Fig. 1d) so, to  
172 inhibit NEC-mediated budding, UL25 must instead bind to the NEC. However, no binding was  
173 detected in solution, either between UL25 $\Delta$ 44 and NEC220 by isothermal titration calorimetry  
174 (Supplementary Fig. S1) or between UL25 $\Delta$ 44 and NEC185 $\Delta$ 50 [a truncated construct that was  
175 crystallized previously (Bigalke and Heldwein 2015)] by size-exclusion chromatography  
176 (Supplementary Fig. S1). Therefore, to bind UL25, NEC may need to be bound to the membrane.  
177 Surface plasmon resonance experiments were also performed, but significant nonspecific binding  
178 precluded clear data interpretation (data not shown).

179  
180 ***Both inhibitory UL25 $\Delta$ 44 Q72A and non-inhibitory UL25 $\Delta$ 73 colocalize with membranes in***  
181 ***the presence of the NEC.*** To visualize UL25 localization in the presence of NEC and  
182 membranes by confocal microscopy, we generated the eGFP-tagged versions of the inhibitory  
183 and non-inhibitory UL25 constructs, eGFP-UL25 $\Delta$ 44 Q72A and eGFP-UL25 $\Delta$ 73. However,  
184 eGFP-UL25 $\Delta$ 44 Q72A construct was unstable during purification, so eGFP-UL25 $\Delta$ 50 Q72A  
185 was generated instead. eGFP-UL25 $\Delta$ 50 Q72A (as well as its untagged version UL25 $\Delta$ 50 Q72A)  
186 efficiently inhibited NEC-mediated budding whereas eGFP-UL25 $\Delta$ 73 did not (Fig. 2a). When

187 eGFP-tagged UL25 constructs were incubated with the fluorescently labelled GUVs, no eGFP  
188 signal was detected on the GUV membranes (data not shown), confirming that UL25 did not  
189 bind membranes directly.

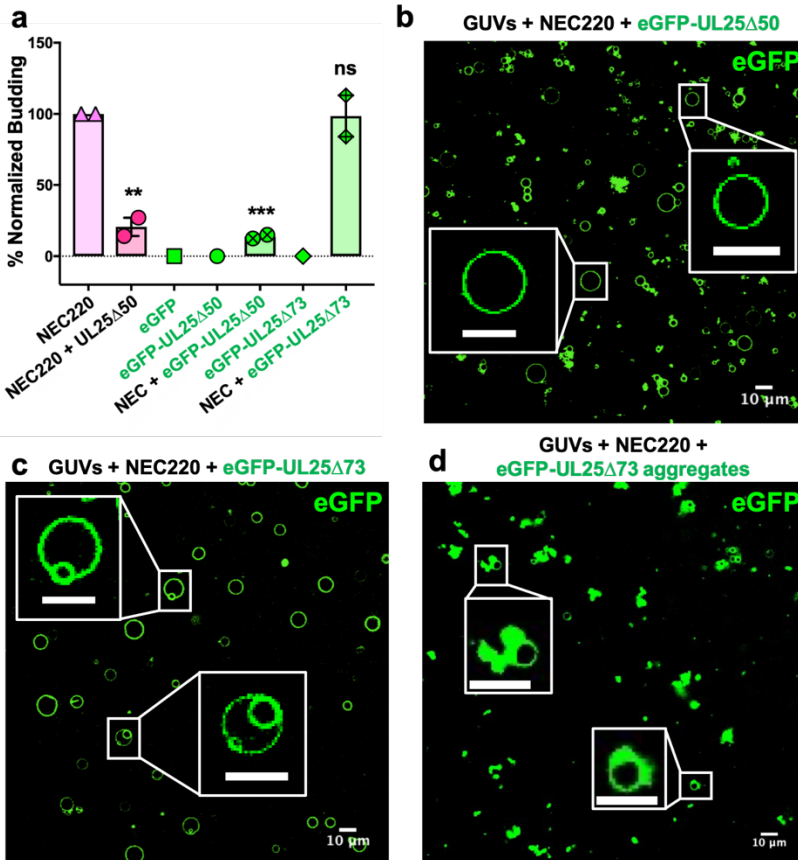

190

191 **Fig. 2. eGFP-UL25 $\Delta$ 50 inhibits NEC budding while eGFP-UL25 $\Delta$ 73 does not.** **a)** Quantification of  
192 NEC budding in the presence of either eGFP-UL25 $\Delta$ 50 or eGFP-UL25 $\Delta$ 73. Each construct (except in the  
193 absence of NEC220) was tested in at least two biological replicates, each consisting of three technical  
194 replicates. Symbols show the average budding efficiency of each biological replicate relative to NEC220  
195 (100%). Error bars represent the standard error of measurement for at least two individual experiments.  
196 Significance compared to NEC220 was calculated using an unpaired t-test against NEC220. \*\*P-value <  
197 0.01 and \*\*\*P-value < 0.001. **b)** Confocal image of eGFP-UL25 $\Delta$ 50 bound to NEC-coated vesicles. No  
198 budding is observed. **c)** Confocal image of eGFP-UL25 $\Delta$ 73 either bound to or budded into vesicles with  
199 the NEC. **d)** Confocal image of eGFP-UL25 $\Delta$ 73 aggregating on the surface of NEC-coated vesicles. All  
200 scale bars = 10  $\mu$ m.

201 Next, eGFP-UL25 $\Delta$ 50 was incubated with the GUVs in the presence of the NEC220, at a  
202 1:10 molar ratio of NEC to UL25 (the minimal inhibitory UL25 concentration). In the presence  
203 of the NEC220, the eGFP-UL25 $\Delta$ 50 colocalized with the GUV membranes, and very little

204 budding was detected (Fig. 2b). UL25 itself does not bind membranes, so instead it must be  
205 binding NEC that is bound to the surface of the GUVs.

206 In the presence of the NEC220, eGFP-UL25 $\Delta$ 73 also colocalized with the GUV  
207 membranes. In this case, the eGFP signal was sometimes detected on the membranes of  
208 intraluminal vesicles (ILVs) inside the GUVs (Fig. 2c) – a product of budding – which  
209 confirmed that binding of eGFP-UL25 $\Delta$ 73 to the NEC220 did not interfere with budding (Fig.  
210 2a) and that eGFP-UL25 $\Delta$ 73 could even remain bound to the NEC-coated membranes  
211 throughout budding.

212 In many cases, however, the eGFP-UL25 $\Delta$ 73 was clustered around the unbudded GUVs,  
213 probably due to its aggregation (Fig. 2d). Such aggregation was not observed for eGFP-  
214 UL25 $\Delta$ 50 Q72A (Fig. 2b). It is conceivable that the absence of half of the long N-terminal helix  
215 of UL25 (Fig. 1a) leads to aggregation of eGFP-UL25 $\Delta$ 73 on NEC-coated GUVs. Although such  
216 aggregation inhibits budding locally (Fig. 2d), bulk measurements show that NEC-mediated  
217 budding remains efficient in the presence of eGFP-UL25 $\Delta$ 73 (Fig. 2a). We hypothesize that  
218 sequestration of large amounts of aggregated eGFP-UL25 $\Delta$ 73 on a few NEC-coated GUVs  
219 reduces its concentration throughout the sample, allowing budding to proceed. Taken together,  
220 these results suggested that while both inhibitory and non-inhibitory UL25 constructs could bind  
221 the membrane-bound NEC, the binding of the inhibitory UL25 construct blocked NEC-mediated  
222 budding whereas the binding of the non-inhibitory UL25 construct did not interfere with it.

223

#### 224 ***Mutations within the putative capsid-binding site on the NEC obviate UL25 inhibition.***

225 Residues D275, K279, and D282 at the membrane-distal tip of UL31 have been implicated in  
226 capsid binding in PRV (Ronfeldt et al. 2017) and in HSV-1 (Takeshima et al. 2019). We

227 generated a quadruple UL31 mutant in which D275, K279, D282, and a nearby C278 were  
228 replaced with alanines. The corresponding mutant NEC220, termed capsid-binding mutant  
229 (NEC220-CBM), mediated budding at levels similar to the WT NEC220 (Fig. 3a) but was  
230 insensitive to inhibition by UL25 $\Delta$ 44 Q72A (Fig. 3a). Moreover, eGFP-UL25 $\Delta$ 50 Q72A did not  
231 co-localize with the GUV membranes in the presence of the NEC220-CBM (Fig. 3b). These  
232 results suggested that UL25 $\Delta$ 44 Q72A bound to the membrane-distal tip of UL31 and that this  
233 interaction was essential for its inhibitory activity.

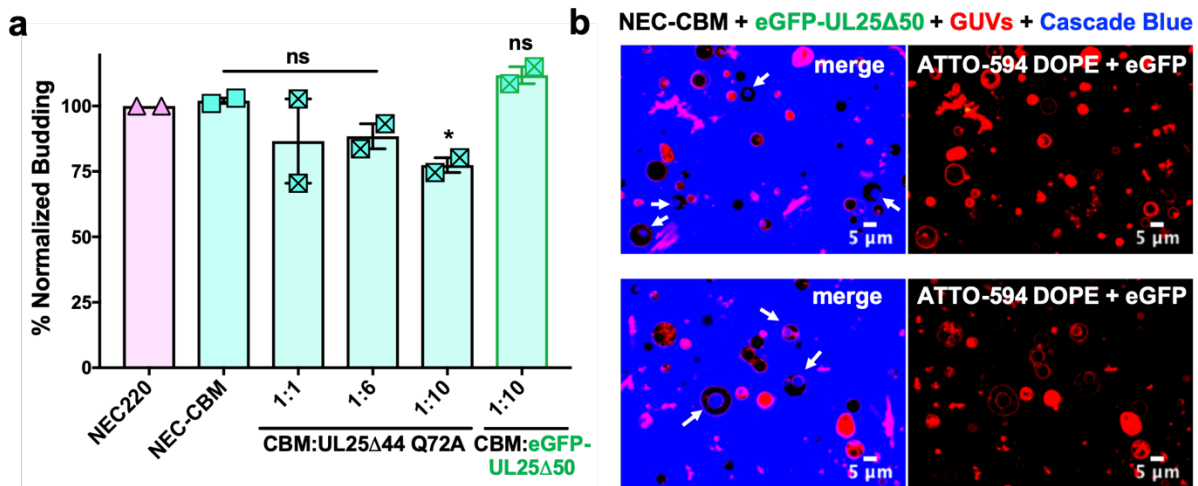

234

235 **Fig. 3. UL25 does not inhibit NEC-CBM budding.** a) NEC-CBM budding is not inhibited by either  
236 UL25 $\Delta$ 44 Q72A or eGFP-UL25 $\Delta$ 50 Q72A. Budding was tested at 1:1, 1:6 and 1:10 NEC220-CBM:UL25  
237 molar ratios for UL25 $\Delta$ 44 Q72A and at a 1:10 NEC-CBM:UL25 molar ratio for eGFP-UL25 $\Delta$ 50 Q72A.  
238 Each condition was tested in at least two biological replicates, each consisting of three technical  
239 replicates. Symbols represent average budding efficiency of each biological replicate relative to NEC220  
240 (100%). Error bars represent the standard error of measurement for at least two individual experiments.  
241 Significance compared to NEC220 was calculated using an unpaired t-test against NEC220. \*P-value <  
242 0.1. b) Confocal microscopy images showing eGFP-UL25 $\Delta$ 50 Q72A does not bind to NEC-CBM coated  
243 GUVs. Intraluminal vesicles due to NEC-CBM budding are indicated by white arrows. Left column is  
244 merged with the red (ATTO-594 DOPE), green (eGFP), and blue channels (Cascade Blue). Right column  
245 is red (ATTO-594 DOPE) and green (eGFP) only.

246

247 **UL25 binds membrane-bound NEC.** To understand how UL25 inhibits NEC-mediated budding,

248 we turned to cryoEM. Previously, we showed that NEC-mediated budding of synthetic large

249 unilamellar vesicles (LUVs) resulted in the formation of smaller vesicles containing ~11-nm

250 thick internal NEC coats (Bigalke et al. 2014). Here, UL25 $\Delta$ 44 Q72A and NEC220 (at a 1:10  
251 molar ratio of NEC to UL25) were incubated with LUVs of the same composition as the GUVs  
252 used in the budding assay and visualized by cryoEM. In the presence of UL25 $\Delta$ 44 Q72A and  
253 NEC220, the LUVs were mostly spherical, and their external surface was coated with ~17-nm  
254 thick coats (Fig. 4a) although these typically did not cover the entire surface (Fig. 4a and  
255 Supplementary Fig. S2). The external coats formed in the presence of UL25 $\Delta$ 44 Q72A are ~6-  
256 nm thicker than the internal NEC coats, and the diameter of the globular portion of UL25 is also  
257 ~ 6 nm. Therefore, we hypothesize that the external coats are composed of a UL25 $\Delta$ 44 Q72A  
258 layer positioned on top of the membrane-bound NEC220 layer (Fig. 4a). Very few budded  
259 vesicles were observed under these conditions, which is consistent with the inefficient budding  
260 observed by confocal microscopy (Fig. 1c). Thus, binding of UL25 $\Delta$ 44 Q72A to the NEC220 on  
261 the surface of the lipid vesicles correlated with its ability to inhibit NEC-mediated budding.

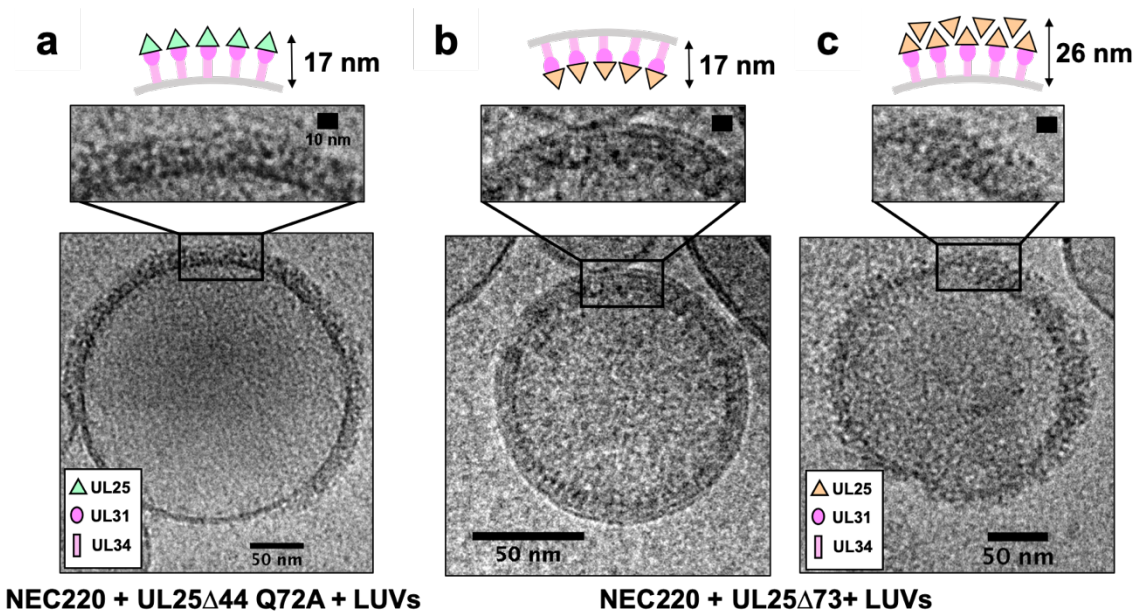

262

263 **Fig. 4. CryoEM shows UL25 $\Delta$ 44 Q72A inhibits NEC budding while UL25 $\Delta$ 73 does not.** CryoEM  
264 images of NEC-mediated budding in the presence of either UL25 $\Delta$ 44 Q72A (a) or UL25 $\Delta$ 73 (b and c).  
265 Aggregation of UL25 $\Delta$ 73 is shown in panel C. Scale bars = 50 nm. Inset scale bars = 10 nm.

266 Co-incubation of UL25 $\Delta$ 73 and NEC220 with LUVs yielded budded vesicles (Fig. 4b)  
267 some of which contained ~17-nm thick internal coats (Fig. 4b), presumably containing UL25 $\Delta$ 73  
268 bound to the NEC220, whereas others contained ~11-nm thick internal coats (data not shown),  
269 presumably containing only NEC220 (Bigalke et al. 2014). We also observed unbudded LUVs  
270 containing >25-nm thick heterogeneous protein aggregates on the external surface (Fig. 4c),  
271 similar to UL25 $\Delta$ 73 aggregates observed by confocal microscopy (Fig. 2d).

272

273 ***UL25 $\Delta$ 44 Q72A forms a net of stars bound to NEC pentagons.*** Interactions between UL25 $\Delta$ 44  
274 Q72A and membrane-bound NEC220 were visualized in three dimensions by cryoET (Fig. 5).  
275 Sub-tomographic averaging of the 3D reconstructions of unbudded LUVs coated with NEC220  
276 and UL25 $\Delta$ 44 Q72A (Fig. 5a) revealed that UL25 $\Delta$ 44 Q72A formed a net of five-pointed stars  
277 (Fig. 5c) covering the surface of membrane-bound NEC220 whereas the NEC220 formed  
278 pentagons (Fig. 5d). Five-pointed stars of UL25 were positioned directly on top of the NEC  
279 pentagons (Figs. 5c, d). The star net of UL25 appears to “lock” the NEC layer in place, which  
280 could prevent it from undergoing conformational rearrangements required for membrane  
281 deformation and budding.

282 The NEC forms hexagonal coats on budded vesicles formed *in-vitro* (Fig. 5b) (Bigalke et  
283 al. 2014) and on perinuclear vesicles formed *in vivo* in NEC-expressing uninfected cells (Hagen  
284 et al. 2015), so ability of the NEC to form pentagons was unexpected. The NEC pentagons and  
285 hexagons have similar dimensions, ~10.5 nm vs. ~11 nm in width (Fig. 5b,d) with ~6.5 nm vs.  
286 ~6.3 nm sides (Fig. 5d) (Bigalke et al. 2014). We know that the hexagons are hexamers of the  
287 NEC heterodimers (Bigalke and Heldwein 2015). Therefore, we hypothesize that the pentagons  
288 are pentamers of the NEC heterodimers. The NEC heterodimers within the pentagons appear

289 slightly tilted relative to the plane of the membrane (Fig. 5a) whereas the hexagons are  
290 perpendicular to the membrane (Fig. 5b).

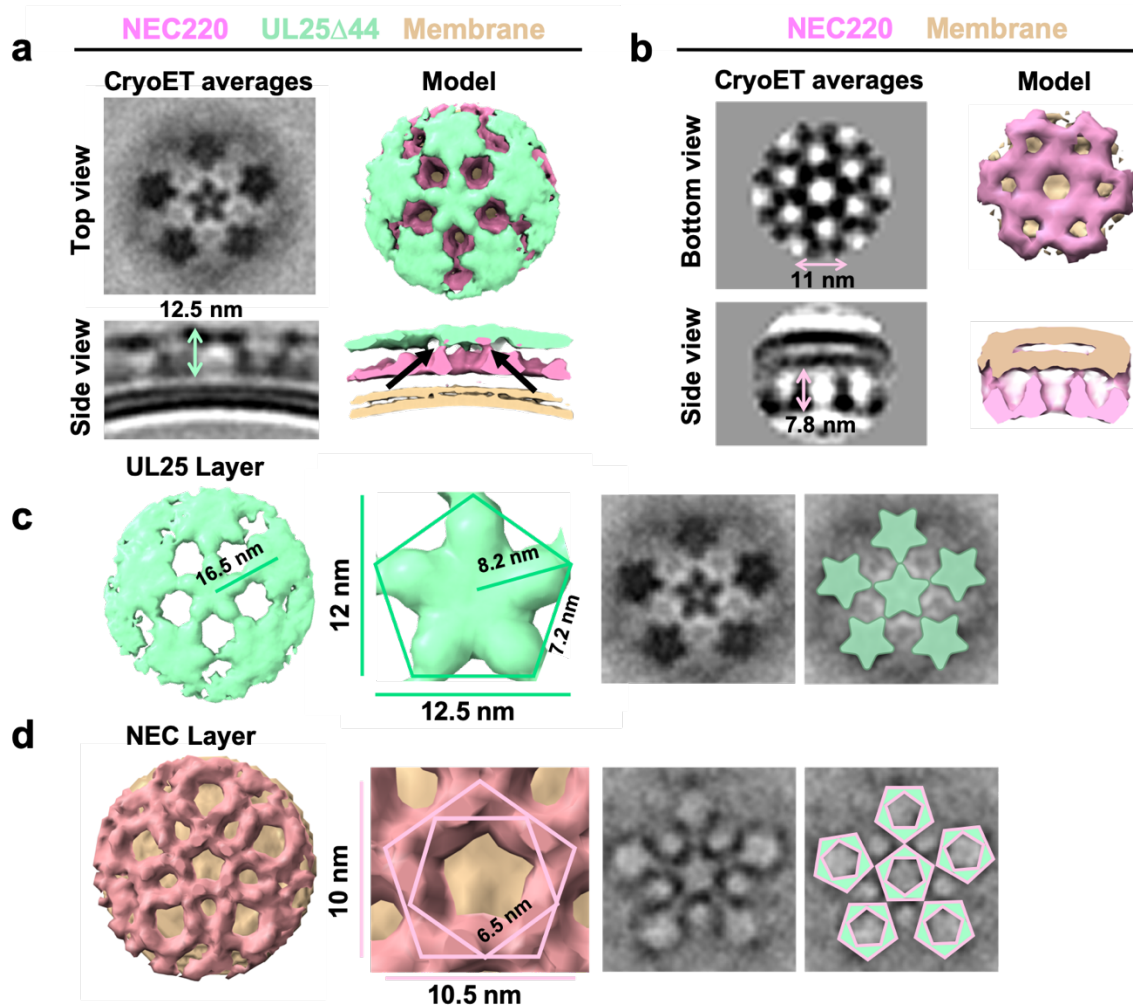

291

292 **Fig. 5. CryoET of UL25-mediated inhibition of NEC budding.** **a)** CryoET averages of NEC in the  
293 presence of UL25Δ44 Q72A (top and side views). Corresponding 3D models are shown with NEC (pink)  
294 and UL25Δ44 Q72A (green). The vesicle bilayer is shown in beige. The models show the UL25 layer  
295 coating the NEC layer in five-pointed stars on the outside of the vesicles. The length of the NEC-UL25  
296 spikes is 12.5 nm. Black arrows indicate the point of tilt within the NEC layer. **b)** CryoET averages of  
297 NEC forming hexameric lattices in the presence of membranes (bottom and side views). Corresponding  
298 3D models are shown with NEC (pink) and the vesicle bilayer (beige). The diameter of the hexameric  
299 rings is ~11 nm, while the length of the spikes is 7.8 nm. **c)** CryoET model and averages of the UL25  
300 layer (green) highlighting the five-pointed star formation of UL25 (represented here as a pentamer of  
301 dimers) in the presence of NEC. **d)** CryoET model and averages of the NEC layer showing NEC forms a  
302 pentagonal lattice (pink pentagons), rather than hexagonal (as seen for wild-type in panel b). Green  
303 triangles indicate location of UL25 binding to the NEC.

304 It should be noted that an entirely pentagonal lattice would yield a small spherical object  
305 with high curvature and icosahedral symmetry – neither of which were observed in our cryoET  
306 averages. Given that the NEC/UL25 spikes did not fully coat the vesicles (Fig. 4a), this only  
307 permitted averaging of local, rather than global, symmetry, providing a snapshot of NEC/UL25  
308 interactions. Furthermore, a mix of both 400 and 800 nm vesicles were used for these  
309 experiments, yielding NEC/UL25-bound vesicles of different sizes, resulting in a difference of  
310 curvature upon data averaging, ultimately preventing us from mapping the coordinates of each  
311 sub-tomogram back onto the raw data to address this issue. Nevertheless, the cryoET data clearly  
312 show the ability of the NEC to form an alternative, pentagonal arrangement in the presence of  
313 UL25. Our results document the ability of the NEC to form different oligomers.

314

## 315 **DISCUSSION**

316 The intrinsic ability of the NEC to deform and bud membranes and to oligomerize into a  
317 hexagonal coat is well established [reviewed in (Bigalke and Heldwein 2016, Mettenleiter 2016,  
318 Bigalke and Heldwein 2017, Roller and Baines 2017)]. However, it is unclear how the capsid  
319 triggers the formation of the NEC coat around it or how the NEC coat is anchored to the capsid.  
320 Moreover, a purely hexagonal lattice is flat, so it remains unknown how the curvature is  
321 generated within the hexagonal NEC coat. Here, we have shown that the NEC forms pentagons  
322 when bound to star-shaped UL25 oligomers. We hypothesize that UL25/NEC interactions  
323 observed *in vitro* mimic UL25/NEC interactions at the capsid vertices and that NEC pentagons  
324 anchor the coat to the capsid. We further hypothesize that NEC pentagons formed at the points of  
325 contact with the capsid vertices could nucleate the assembly of and introduce curvature into the  
326 hexagonal NEC coats.



327 **UL25 inhibits NEC-mediated budding in vitro by forming a star-shaped net over the**  
 328 **membrane-bound NEC layer.** The inhibitory UL25 $\Delta$ 44 Q72A construct, which is composed of a  
 329 globular core and a long N-terminal helix, formed five-pointed stars linked into a net on the  
 330 surface of the membrane-bound NEC220 layer. The five-pointed stars formed by UL25 in our  
 331 cryoET reconstructions resemble the five-pointed stars that crown each capsid vertex and are  
 332 composed of five copies of the capsid-associated tegument complex (CATC) (Dai and Zhou  
 333 2018) (Fig. 6a). Each CATC is composed of two copies of UL25, one copy of UL17, and two

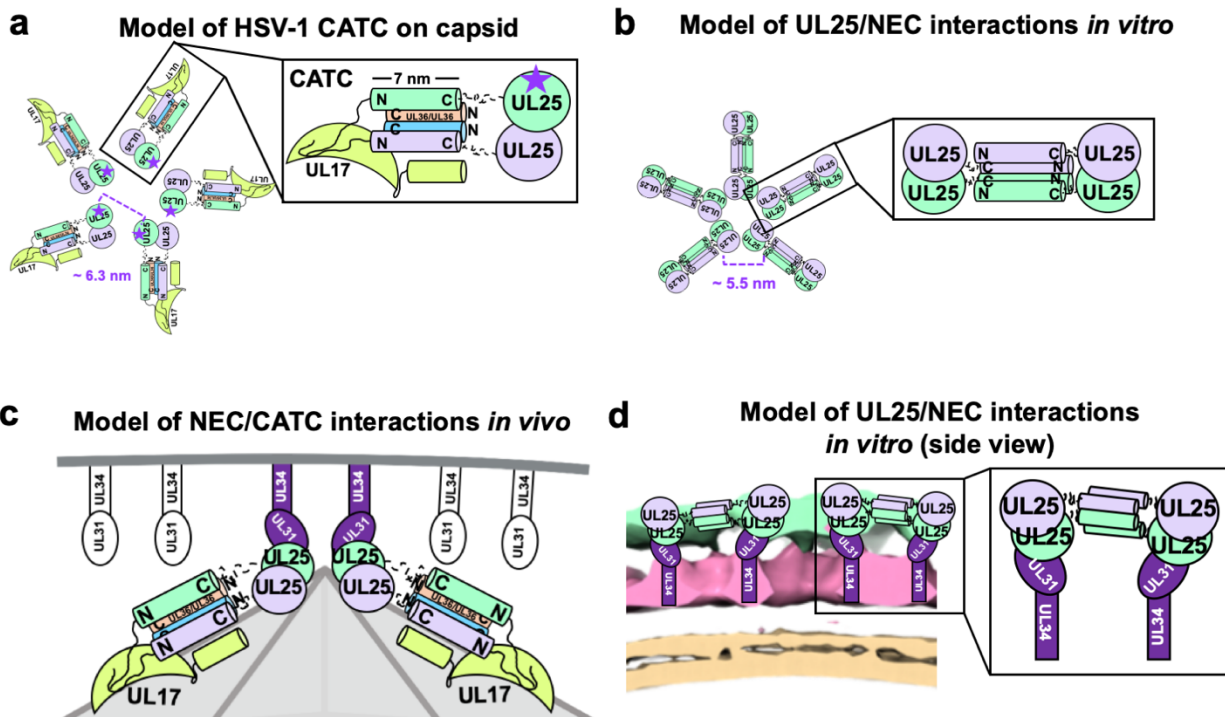

334

335 **Fig. 6. Models of UL25/UL25 and UL25/NEC interactions in vitro and in vivo.** a) A schematic  
 336 representation of the pentagonal HSV-1 CATC [two copies of UL25 (green and purple), two copies of C-  
 337 terminal UL36 (peach and blue) and one copy of UL17 (lime green)] arrangement at the capsid vertex.  
 338 Inset shows a close-up view of the characteristic antiparallel four-helix bundle composed of two UL25  
 339 helices and two UL36 helices. Purple stars indicate the proposed UL25 copies that bind to the NEC upon  
 340 capsid docking. The distance between the centers of two adjacent inner UL25 cores (green) in the capsid  
 341 (Dai & Zhou, 2018) is ~6.3 nm. b) Proposed model of the UL25 stars formed in vitro. The distance  
 342 between the centers of two adjacent UL25 dimers is ~5.5 nm. Inset shows a close-up of the proposed  
 343 antiparallel four-helix bundle composed of two pairs of UL25 helices from adjacent stars. We hypothesize  
 344 that four-helix bundles link the neighboring UL25 stars into a net. c) Proposed side-view model of the  
 345 NEC (purple) interacting with the most surface exposed capsid-bound UL25 (green), resulting in a  
 346 pentameric NEC (indicated by dark purple coloring). NEC molecules prior to capsid binding are shown in  
 347 an unknown oligomeric state (white). d) Side view of the proposed NEC/UL25 interactions in vitro.

348 copies of the C-terminal portion of the tegument protein UL36 (Dai and Zhou 2018) and has a  
349 characteristic antiparallel four-helix bundle composed of two UL25 helices and two UL36  
350 helices (Fig. 6a).

351 We hypothesize that when bound to the NEC220 on the membrane surface *in vitro*,  
352 UL25 $\Delta$ 44 Q72A also forms an antiparallel four-helix bundle. Only in this case, the bundle is  
353 composed of two pairs of UL25 helices from adjacent stars (Fig. 6b). We hypothesize that four-  
354 helix bundles link the neighboring UL25 stars into a net. This arrangement of UL25 would  
355 require that each UL25 “star” consist of 10 copies of UL25, with cores arranged in the center and  
356 5 pairs of helices radiating out (Fig. 6b). The UL25 cores bind the NEC (Fig. 6d), consistent with  
357 previous studies (Yang et al. 2014).

358 Based on our observations, we propose the following model of NEC-mediated budding *in*  
359 *vitro* and its inhibition by UL25 (Fig. 7). *In vitro*, the NEC-mediated membrane budding leads to  
360 the formation of negative membrane curvature and the internal NEC coats on the budded vesicles  
361 (Fig. 7a). UL25 $\Delta$ 44 Q72A binds the membrane-bound NEC and forms five-pointed stars on top  
362 of NEC pentagons (Fig. 7b) that are linked into a net. Formation of this net could inhibit budding  
363 by restricting conformational changes within the NEC lattice necessary to generate negative  
364 membrane curvature. By contrast, UL25 $\Delta$ 73 construct does not inhibit budding. Residues 45-73  
365 form about half of the 7-nm-long N-terminal helix (Fig. 1a). Their removal probably precludes  
366 formation of stable four-helix bundles. UL25 $\Delta$ 73 is also prone to aggregation likely because the  
367 shorter helix is less stable (Fig. 7c).

368

369

370

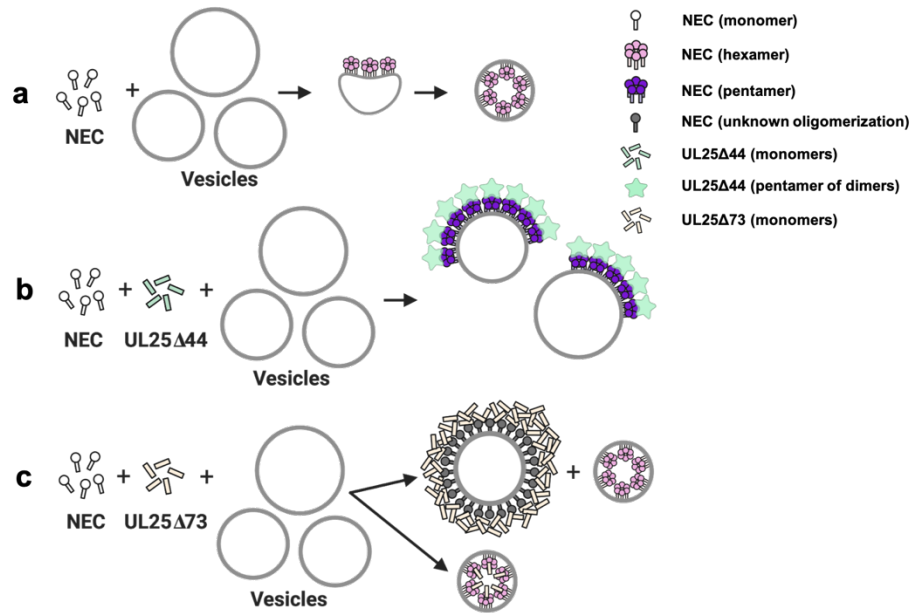

371

372 **Fig. 6. A model of NEC-mediated budding in the absence and presence of UL25, in vitro.** **a)** NEC-  
373 mediated budding requires only the NEC, which vesiculates membranes by forming hexagonal coats  
374 (pink) that, potentially, contain irregular defects to achieve curvature. **b)** UL25 $\Delta$ 44 Q72A (green) inhibits  
375 NEC-mediated budding by inducing the formation of a pentagonal NEC coat (purple) suboptimal for  
376 budding. **c)** UL25 $\Delta$ 73 (peach) aggregates around some NEC-coated vesicles, which blocks budding.  
377 Sequestration of UL25 $\Delta$ 73 at a few locations reduces its concentration elsewhere and enables budding.  
378 Binding of UL25 $\Delta$ 73 to NEC in the absence of aggregation does not interfere with budding, and bound  
379 UL25 $\Delta$ 73 buds into vesicles with the NEC. This figure was created with Biorender.com.

380 ***Inhibition of NEC-mediated budding by UL25 is likely an in-vitro phenomenon.*** The robust  
381 budding ability of the NEC, which is observed both *in vitro* or in NEC-expressing uninfected  
382 cells, must be controlled during infection to ensure budding of only mature capsids and to  
383 prevent premature, non-productive budding. NEC budding is presumably negatively regulated by  
384 a viral protein. It is tempting to speculate that UL25 could inhibit the budding activity of the  
385 NEC not only *in vitro* but also during infection. Free UL25 is likely present within the nucleus,  
386 but if it were to inhibit NEC-mediated budding, it would then be expected to bind the accumulate  
387 at the nuclear rim and accumulate there. Yet, such accumulation has not yet been observed.  
388 Therefore, inhibition of NEC-mediated budding by UL25 is likely an *in vitro* phenomenon.  
389 Instead, we hypothesize that interactions between UL25 and membrane-bound NEC, which we

390 observed by cryoET and which likely result in budding inhibition *in vitro*, mimic interactions of  
391 the NEC with UL25 on the capsid vertices.  
392  
393 ***UL25/NEC interactions in vitro mimic interactions between CATC at the capsid vertices and***  
394 ***the NEC coats during infection.*** We observed that when bound to UL25 *in vitro*, the NEC  
395 formed pentagons, which established that the NEC can oligomerize into both hexamers and  
396 pentamers and that the oligomeric state of the NEC was influenced by UL25. We hypothesize  
397 that NEC pentagons formed at the points of contact with the capsid vertices help anchor the NEC  
398 coat to the capsid.

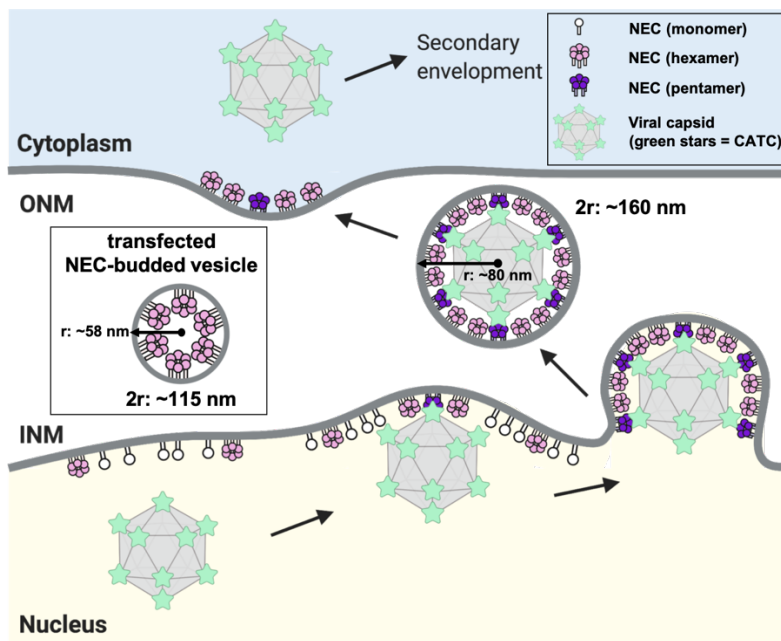

399

400 **Fig. 7. A model of NEC-mediated budding in HSV-1 infected cells.** Capsid-bound UL25 induces the  
401 formation of pentagonal insertions (purple pentamers) within the NEC coat (pink hexamers and white  
402 monomers) as it is forming, which enables the formation of an NEC coat of appropriate size and curvature  
403 around the capsid. Inset shows a transfected NEC-budded vesicle which forms a hexagonal coat with  
404 presumably irregular defects, similar to the NEC coat formed *in vitro*. This figure was created with  
405 Biorender.com.

406 Each capsid vertex is crowned by a five-pointed star composed of five copies of CATC,

407 with 10 globular cores of UL25 arranged in the center as loosely associated dimers (Fig. 6a) (Dai

408 and Zhou 2018). We hypothesize that binding of the cores of five neighboring CATC copies at  
409 each capsid vertex (Figs. 6a, b) to the NEC promotes formation of pentagons that attach the coat  
410 to the capsid vertices through increased avidity (Fig. 8). The distance between the presumed  
411 locations of the cores within the UL25 stars observed *in vitro* is ~5.5 nm (Fig. 6b). The distance  
412 between the cores of the innermost UL25 copies within the CATC stars is somewhat longer, ~6.3  
413 nm (Fig. 6a), but the cores could move into most favorable orientations for binding the NEC.  
414 The dynamic nature of the UL25 cores is evident from the cryoEM reconstructions, which show  
415 the cores connected to the N-terminal helices by long, flexible linkers (Dai and Zhou 2018). On  
416 the other hand, the NEC may be able to tilt relative to the membrane surface (Fig. 5a), which  
417 would also allow each NEC to adopt the optimal orientation for binding the UL25 cores at the  
418 capsid vertices.

419         UL25 and the NEC – a monomer and a heterodimer, respectively – do not interact in  
420 solution but do interact when the NEC is bound to the membrane, which implies the importance  
421 of avidity in binding. The oligomeric state of the NEC prior to the arrival of the capsid is  
422 unknown, but high concentration of the NEC at the inner nuclear membrane (Hagen et al. 2015,  
423 Newcomb et al. 2017) would provide enough NEC copies locally to form a binding site for  
424 UL25 at the capsid vertex.

425         UL25 likely binds to the membrane-distal tip of UL31 because mutations within that  
426 region render NEC-CBM mutant insensitive to inhibition by UL25. These results are in  
427 agreement with the study by Takeshima *et al.* that showed this UL25-NEC interaction involved  
428 UL31 residues R281 and D282 (Takeshima et al. 2019). Other charged residues within the  
429 membrane-distal region of UL31 have also been implicated in capsid interactions in PRV  
430 (Ronfeldt et al. 2017). Thus, we hypothesize that binding of the capsid to the NEC during

431 nuclear egress are mediated by UL25/UL31 interactions. Indeed, NEC185 $\Delta$ 50 (a previously  
432 crystallized truncated construct with an intact membrane-distal UL31 region) from *E. coli* binds  
433 purified nucleocapsids from HSV-1 infected cells, and this interaction requires UL25 rather than  
434 the VP5, VP23, or UL17 capsid proteins (Takeshima et al. 2019). Nucleocapsids can also bind  
435 free UL31 (Yang and Baines 2011, Yang et al. 2014).

436

437 ***How does the hexagonal NEC lattice achieve curvature?*** The ability of the NEC to oligomerize  
438 into a hexagonal lattice *in vitro* and *in vivo* is well documented (Bigalke et al. 2014, Bigalke and  
439 Heldwein 2015, Hagen et al. 2015) and is an important feature of its membrane deformation  
440 mechanism (Roller et al. 2010, Bigalke et al. 2014, Bigalke and Heldwein 2015). But how the  
441 hexagonal NEC lattice accommodates curvature is yet unclear.

442 A strictly hexagonal lattice is flat, so the curvature is typically achieved through the  
443 inclusion of lattice defects, also termed insertions. These can either be regular insertions of a  
444 different geometry, for example, pentagons – as observed in icosahedral or fullerene-like capsids  
445 – or irregular insertions. Although no deviations from the hexagonal symmetry have yet been  
446 visualized in any NEC coats (Bigalke et al. 2014, Hagen et al. 2015, Newcomb et al. 2017), this  
447 could be due to the low resolution of the cryoET reconstructions or the imposition of symmetry  
448 in averaging. For example, one study used cryoEM and cryoET to visualize NEC/capsid  
449 interactions within perinuclear enveloped virions isolated from cells infected with an US3  
450 kinase-null HSV-1 (Newcomb et al. 2017), a mutation that causes the accumulation of  
451 perinuclear enveloped virions. Although only the hexagonal NEC arrays were observed, the  
452 averaging of NEC/CATC interactions was hindered by significant noise in the relevant regions  
453 of the tomograms because the NEC coat did not have the same icosahedral symmetry as the

454 capsid. As the result, NEC/CATC interactions were difficult to visualize. Additionally, the lack  
455 of US3 could have altered the structure of the NEC coat or the NEC/CATC interactions.

456 In perinuclear viral particles formed in PRV-infected cells, the NEC coats appear tightly  
457 associated with the capsid (Hagen et al. 2015). Capsidless perinuclear vesicles formed in  
458 uninfected cells expressing PRV NEC (Hagen et al. 2015) are relatively uniform in size (~115  
459 nm in diameter; Fig. 8, inset) but smaller than the capsid (~125 nm in diameter (Liu et al. 2017,  
460 Dai and Zhou 2018)) or the perinuclear vesicles isolated from cells infected with the HSV-1  
461 US3-null mutant virus (~160 nm in diameter (Newcomb et al. 2017)) (Fig. 8). The capsid thus  
462 appears to define the size of NEC-budded vesicles during infection, so the capsid geometry could  
463 influence the geometry of the NEC coat.

464 Based on our observation that the NEC forms pentagons when bound to UL25, we  
465 hypothesize that during nuclear egress, NEC pentagons formed at the points of contact with the  
466 capsid vertices not only anchor the NEC coat to the capsid but also generate NEC coat of  
467 appropriate curvature through the inclusion of pentagons into a hexagonal coat as it assembles  
468 around the capsid. A similar strategy is observed during HIV-1 capsid formation by the Gag  
469 protein (Briggs et al. 2009, Schur et al. 2015). As the mature capsid is built, the Gag protein is  
470 cleaved, and the Gag capsid-domain builds a hexagonal lattice containing 12 pentamers to form a  
471 closed fullerene-like structure.

472 We do not yet understand how curved NEC coats are assembled in the absence of capsid.  
473 Hexagonal NEC coats formed in *in vitro* or in NEC-expressing cells have a smaller diameter  
474 than those formed around the capsid (Fig. 8), so they may achieve coat curvature by other means,  
475 for example, by having irregular defects. Incorporation of irregular defects into curved hexagonal  
476 lattices have been observed for immature HIV capsids formed by Gag protein (Briggs et al.

477 2009, Schur et al. 2015) and in early poxvirus envelopes formed by the D13 protein (Heuser  
478 2005, Hyun et al. 2011). NEC could, potentially, use a similar strategy in the absence of a  
479 capsids.

480

481 ***A model of NEC-mediated capsid budding during infection.*** Based on our observations, we  
482 propose the following model of NEC-mediated capsid budding during nuclear egress in infected  
483 cells (Fig. 8). Binding of the cores of five neighboring copies of CATC at the capsid vertices to  
484 the NEC at the INM would promote formation of NEC pentagons, which would help anchor the  
485 capsid to the INM and could also serve as a nucleation event for the assembly of the NEC coat  
486 around the capsid. As the hexagonal NEC coat continues to grow, the incorporation of pentagons  
487 into the coat at the points of contact with the vertices would both help attach the NEC coat to the  
488 capsid and introduce curvature into the NEC coat (Fig. 8).

489 In both HSV-1 and PRV, removal of UL25 results in an accumulation of capsids at the  
490 INM, unable to undergo egress (Klupp et al. 2006, Kuhn et al. 2008). Our results suggest that  
491 UL25 both anchors the NEC coat to the capsid and contributes to formation of a curved coat.  
492 Additionally, our results could potentially explain why mostly mature, DNA-containing C-  
493 capsids undergo budding at the INM (Roizman and Furlong 1974, Klupp et al. 2011). A- and B-  
494 capsids have fewer UL25 copies on the capsid surface (Newcomb et al. 2006), and we  
495 hypothesize that only C-capsids, which contain UL25 at a full occupancy, can generate  
496 pentagonal NEC insertions necessary for the formation of an NEC coat around the capsid. In this  
497 manner, NEC/UL25 interactions could provide a quality-control mechanism that would favor  
498 budding of mature, DNA-containing C-capsids – which have a full UL25 set – over the immature  
499 capsid forms with fewer UL25 copies thereby acting as a checkpoint during nuclear egress.



500 **ACKNOWLEDGMENTS**

501 We thank Janna Bigalke for generating the UL25 $\Delta$ 44 and UL25 $\Delta$ 73 plasmids, purifying the  
502 corresponding proteins, and performing the ITC and the size-exclusion experiments. We thank  
503 Alenka Lovy (Tufts University) for assistance with fluorescence microscopy experiments and  
504 Mike Rigney (Brandeis University) for assistance with cryoEM imaging. We also thank Peter  
505 Cherepanov (Francis Crick Institute) for the gift of the GST-PreScission protease expression  
506 plasmid and Thomas Schwartz (Massachusetts Institute of Technology) for the gift of LoBSTr  
507 cells. ITC experiments were performed at the Center for Macromolecular Interactions in the  
508 Department of Biological Chemistry and Molecular Pharmacology at Harvard Medical School.  
509 CryoEM images were collected at the Electron Microscopy Facility at Brandeis University.  
510 CryoET data were collected at the Electron Imaging Center for Nanomachines at the University  
511 of California, Los Angeles. This work was funded by the NIH grants R01GM111795 (E.E.H.),  
512 1S10OD018111 (Z.H.Z.), 1U24GM116792 (Z.H.Z.), a Faculty Scholar grant from Howard  
513 Hughes Medical Institute (E.E.H.), NIH postdoctoral fellowship F32GM126760 (E.B.D.), the  
514 NSF grants DBI-1338135 (Z.H.Z.) and DMR-1548924 (Z.H.Z.), Burroughs Wellcome Fund  
515 Collaborative Research Travel Grant (E.B.D.), and the Natalie V. Zucker Research Grant  
516 (E.B.D.).

517

518 **AUTHOR CONTRIBUTIONS**

519 E.B.D. and E.E.H. designed and coordinated the project; E.B.D. performed the experiments  
520 (with the exception of the ITC and size-exclusion experiments) under the guidance of E.E.H;  
521 E.B.D. and J.Z. collected cryoET data under the guidance of Z.H.Z; J.Z. processed the cryoET  
522 data; all authors analyzed the data, interpreted the results and wrote the manuscript.

523 **COMPETING INTERESTS**

524 The authors declare no competing interests.

525

526 **DATA AVAILABILITY STATEMENT**

527 The EM datasets generated in this study will be deposited into the Electron Microscopy Data

528 Bank and will be immediately available upon publication.

529 **METHODS**

530 **Cloning.** All primers used in cloning are listed in Supplementary Table S1. Codon-optimized  
531 UL25 gene from HSV-1 strain KOS was synthesized by GeneArt. Digested PCR fragments  
532 encoding UL25 $\Delta$ 44 were subcloned by restriction digest into the pJP4 plasmid, which contains a  
533 His<sub>6</sub>-SUMO-PreScission tag in frame with the BamHI restriction site of the multiple-cloning site  
534 in a pET24b vector, creating the pJB104 plasmid. DNA fragments encoding UL25 $\Delta$ 50 and  
535 UL25 $\Delta$ 73 were amplified by PCR from pJB104 (UL25 $\Delta$ 44) and subcloned into pJP4 by  
536 restriction digest using BamHI and XhoI, creating the UL25 $\Delta$ 50 (pED13) and UL25 $\Delta$ 73  
537 (pJB123) plasmids. Site-directed mutagenesis of pJB104 yielded the UL25 $\Delta$ 44 Q72A mutant  
538 plasmid (pED03).

539 DNA encoding the eGFP sequence was PCR amplified out of the eGFP-N2 plasmid  
540 (Clontech) and subcloned via single-cut restriction digest into the corresponding UL25 plasmid  
541 harboring the cleavable His<sub>6</sub>-SUMO tag [(either UL25 $\Delta$ 50 (pED13) or UL25 $\Delta$ 73 (pJB123)]  
542 creating either the eGFP-UL25 $\Delta$ 50 (pED14) or eGFP-UL25 $\Delta$ 73 (pED05) constructs.

543 Site-directed mutagenesis of pKH90 (UL31 1-306) using a splicing by overlap extension  
544 protocol(Heckman and Pease 2007) followed by restriction digest into the pJP4 vector was used  
545 to create the UL31 D275A/C278A/K279A/D282A mutant (pJB118) in the capsid binding mutant  
546 construct (NEC-CBM).

547

548 **Expression and purification of NEC constructs.** Plasmids encoding HSV-1 UL31 1-306  
549 (pKH90) and UL34 1-220 (pJB02) were co-transformed into *Escherichia coli* BL21(DE3)  
550 LoBStr cells (Kerafast) to generate NEC220 (Bigalke et al. 2014). Plasmids encoding HSV-1  
551 UL31 1-306 D275A/C278A/K279A/D282A (pJB118) and UL34 1-220 (pJB02) were co-

552 transformed into *E. coli* BL21(DE3) LoBStr cells (Kerafast) to generate NEC-CBM. All  
553 constructs were expressed using autoinduction at 37 °C in Terrific Broth (TB) supplemented  
554 with 100 µg/mL kanamycin, 100 µg/mL ampicillin, 0.2% lactose and 2 mM MgSO<sub>4</sub> for 4 h. The  
555 temperature was then reduced to 25 °C for 16 h. Cells were harvested at 5,000 x g for 30 min.  
556 NEC proteins were purified as previously described(Bigalke et al. 2014) with slight  
557 modifications. The NEC220 and NEC-CBM constructs were passed over 2 x 1 mL HiTrap Talon  
558 columns (GE Healthcare), rather than ion exchange as previously described, to remove excess  
559 cleaved His<sub>6</sub>-SUMO before injection onto size-exclusion chromatography (as previously  
560 described).

561  
562 ***Expression and purification of UL25 constructs.*** Plasmids encoding either HSV-1 UL25 or  
563 eGFP-UL25 constructs were transformed into *E. coli* BL21(DE3) LoBStr cells and expressed  
564 using autoinduction at 37 °C in TB supplemented with 100 µg/mL kanamycin, 0.2% lactose, and  
565 2 mM MgSO<sub>4</sub> for 4 h. The temperature was then reduced to 25 °C for 16 h. Cells were harvested  
566 at 5,000 x g for 30 min. All purification steps were performed at 4 °C. UL25 constructs were  
567 purified in lysis buffer (50 mM Na HEPES pH 7.5, 500 mM NaCl, 1 mM TCEP, and 10%  
568 glycerol). Cells were resuspended in lysis buffer supplemented with Complete protease inhibitor  
569 (Roche) and lysed with a microfluidizer (Microfluidics). The cell lysate was clarified by  
570 centrifugation at 13,000 x g for 35 min and was passed over Ni-NTA sepharose (GE Healthcare)  
571 column. The column was subsequently washed with 20 mM and 40 mM imidazole lysis buffer  
572 and bound proteins were eluted with 250 mM imidazole lysis buffer. The His<sub>6</sub>-SUMO tag was  
573 cleaved for 16 h using PreScission Protease produced in-house from a GST-PreScission fusion  
574 protein expression plasmid. As a final purification step, UL25 constructs were purified with size-

575 exclusion chromatography using either a Superdex 75 or 200 column (GE Healthcare)  
576 equilibrated with gel filtration buffer (20 mM Na HEPES, pH 7.0, 100 mM NaCl, and 1 mM  
577 TCEP). The UL25 constructs were purified to homogeneity as assessed by 12% SDS-PAGE and  
578 Coomassie staining. Fractions containing UL25 were concentrated up to ~30 mg/mL and stored  
579 at -80 °C to prevent degradation observed at 4 °C. Protein concentration was determined by  
580 absorbance measurements at 280 nm. The typical yield was 35 mg/L of TB culture.

581  
582 ***Co-sedimentation assay.*** Co-sedimentation of UL25 $\Delta$ 44 to acidic multilamellar vesicles (MLVs)  
583 was performed as previously described (Bigalke et al. 2014). MLVs were prepared in a 3:1:1  
584 ratio of 1-palmitoyl-2-oleoyl-glycero-3-phosphocholine (POPC):1-palmitoyl-2-oleoyl-sn-  
585 glycero-3-phospho-L-serine (POPS):1-palmitoyl-2-oleoyl-sn-glycero-3-phosphate (POPA)  
586 (Avanti Polar Lipids). Background signal in the absence of liposomes is due to protein  
587 aggregation during centrifugation.

588  
589 ***In vitro GUV budding assays.*** Giant unilamellar vesicles (GUVs; used for their large size and  
590 ease of identification at the microscope) were prepared as previously described (Bigalke et al.  
591 2014). For NEC220 only budding quantification, a total of 10  $\mu$ L of GUVs with a 3:1:1 ratio of  
592 POPC:POPS:POPA containing ATTO-594 DOPE (ATTO-TEC GmbH) at a concentration of 0.2  
593  $\mu$ g/ $\mu$ L was mixed with 1  $\mu$ M NEC220 (final concentration), and 0.2 mg/mL (final concentration)  
594 Cascade Blue Hydrazide (ThermoFisher Scientific). For the NEC and UL25 titration  
595 experiments, 10  $\mu$ L of GUVs and either 1, 6, 8, 10 or 20  $\mu$ M of UL25 $\Delta$ 44 Q72A, UL25 $\Delta$ 58  
596 Q72A or UL25 $\Delta$ 73 (final concentration) were incubated with 1  $\mu$ M of NEC220 (final  
597 concentration) along with Cascade Blue. For NEC-CBM and UL25 titration experiments, 10  $\mu$ L

598 of GUVs and either 1, 6, or 10  $\mu\text{M}$  of UL25 $\Delta$ 44 Q72A (final concentration) were incubated with  
599 1  $\mu\text{M}$  of NEC-CBM (final concentration) along with Cascade Blue. The total volume of each  
600 sample during imaging for all experiments was brought to 100  $\mu\text{L}$  with gel filtration buffer and  
601 the reaction was incubated for 5 min at 20  $^{\circ}\text{C}$ . Samples were imaged in a 96-well chambered  
602 cover-glass. Images were acquired using a Nikon A1R Confocal Microscope with a 60x oil  
603 immersion lens at the Tufts Imaging Facility in the Center for Neuroscience Research at Tufts  
604 University School of Medicine. Images of NEC budding in the presence of eGFP-UL25  
605 constructs were recorded after incubation of 10  $\mu\text{L}$  of GUVs with 10  $\mu\text{M}$  (final concentration) of  
606 either eGFP-UL25 $\Delta$ 50 Q72A or eGFP-UL25 $\Delta$ 73 and 1  $\mu\text{M}$  of NEC220 (final concentration).  
607 Quantification was performed by counting vesicles in 15 different frames of the sample (~300  
608 vesicles total). Raw data values for all experiments are listed in Supplementary Table S2. Each  
609 condition was tested in at least two biological replicates. Prior to analysis, the background was  
610 subtracted from the raw values. The reported values represent the average budding activity  
611 relative to NEC220 (100%). The standard error of the mean is reported for each measurement.  
612 Significance compared to NEC220 was calculated using an unpaired one-tailed *t*-test against  
613 NEC220.

614  
615 ***Isothermal titration calorimetry (ITC).*** ITC measurements were recorded using a Microcal  
616 ITC200 (Malvern Panalytical) at the Center for Macromolecular Interactions at Harvard Medical  
617 School. A solution of UL25 $\Delta$ 44 (200  $\mu\text{M}$ ) was titrated into a solution of NEC220 (20  $\mu\text{M}$ ) in 20  
618 mM Na HEPES, pH 7.0, 150 mM NaCl, 1 mM TCEP. Control experiments were performed by  
619 injecting UL25 $\Delta$ 44 into buffer. Thermograms were plotted by subtracting heats of the control  
620 experiments from the sample experiments. The data were not fit due to no detectable binding.

621  
622 ***Cryoelectron microscopy and tomography.*** A volume of 10  $\mu\text{L}$  of a 1:1 mixture of 400-nm and  
623 800-nm large unilamellar vesicles (LUVs) made of 3:1:1 POPC:POPS:POPA [prepared as  
624 previously described (Bigalke et al. 2014)] were mixed on ice with a 30  $\mu\text{L}$  solution of NEC220  
625 and either UL25 $\Delta$ 44 Q72A or UL25 $\Delta$ 73, yielding an NEC:UL25 ratio of 1:10 (NEC  
626 concentration was at 1 mg/mL). After 30 min, 3  $\mu\text{L}$  of sample was applied to glow-discharged  
627 (30 s) Quantifoil copper grids (R2/2, 200 mesh, Electron Microscopy Sciences), blotted on both  
628 sides for 4 s, and vitrified by rapid freezing in liquid ethane (Vitrobot). Grids were stored in  
629 liquid nitrogen until loaded into a Tecnai F20 transmission electron microscope (FEI) via a cryo  
630 holder (Gatan). The microscope was operated in low dose mode at 200 keV using SerialEM  
631 (Mastronarde 2005) and images were recorded with a 4k x 4k charge coupled device camera  
632 (Ultrascan, Gatan) at 29,000-fold magnification (pixel size: 0.632 nm). 2D cryo-EM images were  
633 recorded at defocus values of -4 to -8  $\mu\text{m}$  and an electron dose  $\sim 15 \text{ e}/\text{\AA}^2$ . Images are displayed  
634 using ImageJ (Schindelin et al. 2015).

635 For single-axis cryoET data used to generate 3D EM data, samples were incubated on ice  
636 for 30 min, and 0.8  $\mu\text{L}$  of 10 nm colloidal gold coated with protein A (Cell Microscopy Core,  
637 University Medical Center Utrecht, Department of Cell Biology) was added to the solution and  
638 mixed. The mixture (2.5  $\mu\text{L}$ ) was applied to freshly glow-discharged (30 s) Quantifoil R 3.5/1  
639 grids (Electron Microscopy Sciences) and manually blotted before being flash-frozen in liquid  
640 ethane. Grids were loaded into a FEI Titan Krios electron microscope equipped with a Gatan  
641 imaging filter (GIF) and a Gatan K2 summit direct electron detection camera (Roper  
642 Technologies, Inc.), operated at 300 kV. The acquisition for automated cryoET tilt series  
643 collection was performed using SerialEM (Mastronarde 2005). A tilt series was collected in

644 which the sample was tilted from 0° to +60° degrees and then from 0° to -60°, each in a stepwise  
645 fashion with 2° increments. Tilt series were acquired at a magnification of x53,000  
646 (corresponding to a calibrated pixel size of 2.6 Å) with a maintained defocus value of -3 to -4  
647 µm. The total electron dose was ~100 e/Å<sup>2</sup>.

648

649 **3D reconstruction and subtomographic averaging.** The detailed steps of the 3D reconstruction  
650 and subtomographic averaging were previously described (Si et al. 2018). Briefly, frames from  
651 each recorded tilt series were drift-corrected and averaged with *Motioncorr* (Mastronarde 2005)  
652 and was further reconstructed with contrast transfer function (CTF) correction using the IMOD  
653 software package (Kremer et al. 1996). Two resulting tomograms were produced by the  
654 weighted back projection and simultaneous iterative reconstruction technique (SIRT) methods. A  
655 total of 1200 particles were picked for tomograms containing LUVs, NEC220 and UL25Δ44  
656 Q72A. 3D sub-tomographic averaging was completed as described (Si et al. 2018) using the  
657 PEET (particle estimation for electron tomography) software (Nicastro et al. 2006). Five-fold  
658 symmetry was only applied after five-fold symmetry was apparent in the averaged structure. The  
659 original dataset was split into two separate groups, even group and odd group, and averaged  
660 independently. Gold standard Fourier Shell Correlation (FSC) analysis for the averaged structure  
661 was performed by *calcUnbiasedFSC* in PEET when the two averaged structures converged. The  
662 reported resolution is 29 Å based on the 0.143 gold-standard FSC criterion. EM maps will be  
663 deposited into the Electron Microscopy Data Bank (EMDB) for immediate access upon  
664 publication.

665



666  
667  
668  
669  
670  
671  
672  
673  
674  
675  
676  
677  
678  
679  
680  
681  
682  
683  
684  
685  
686  
687  
688  
689  
690  
691  
692  
693  
694  
695  
696  
697  
698  
699

## References

- Arii, J., K. Takeshima, Y. Maruzuru, N. Koyanagi, A. Kato and Y. Kawaguchi (2019). "Roles of the Interhexamer Contact Site for Hexagonal Lattice Formation of the Herpes Simplex Virus 1 Nuclear Egress Complex in Viral Primary Envelopment and Replication." Journal of Virology **93**(14).
- Bigalke, J. M. and E. E. Heldwein (2015). "Structural basis of membrane budding by the nuclear egress complex of herpesviruses." EMBO Journal **34**(23): 2921-2936.
- Bigalke, J. M. and E. E. Heldwein (2016). "Nuclear exodus: Herpesviruses lead the way." Annual Review of Virology **3**(1): 387-409.
- Bigalke, J. M. and E. E. Heldwein (2017). "Have NEC coat, will travel: Structural basis of membrane budding during nuclear egress in herpesviruses." Advances in virus research **97**: 107-141.
- Bigalke, J. M., T. Heuser, D. Nicastro and E. E. Heldwein (2014). "Membrane deformation and scission by the HSV-1 nuclear egress complex." Nature Communications **5**: 4131.
- Bowman, B. R., R. L. Welschhans, H. Jayaram, N. D. Stow, V. G. Preston and F. A. Quijoch (2006). "Structural characterization of the UL25 DNA-packaging protein from herpes simplex virus type 1." Journal of Virology **80**(5): 2309-2317.
- Briggs, J. A., J. D. Riches, B. Glass, V. Bartonova, G. Zanetti and H. G. Krausslich (2009). "Structure and assembly of immature HIV." Proceedings of the National Academy of Sciences of the United States of America **106**(27): 11090-11095.
- Briggs, J. A., J. D. Riches, B. Glass, V. Bartonova, G. Zanetti and H. G. Krausslich (2009). "Structure and assembly of immature HIV." Proc Natl Acad Sci U S A **106**(27): 11090-11095.
- Chang, Y. E. and B. Roizman (1993). "The product of the UL31 gene of herpes simplex virus 1 is a nuclear phosphoprotein which partitions with the nuclear matrix." Journal of Virology **67**(11): 6348-6356.
- Cockrell, S. K., M. E. Sanchez, A. Erazo and F. L. Homa (2009). "Role of the UL25 protein in herpes simplex virus DNA encapsidation." J Virol **83**(1): 47-57.
- Dai, X. and Z. H. Zhou (2018). "Structure of the herpes simplex virus 1 capsid with associated tegument protein complexes." Science **360**(6384).
- Fuchs, W., B. G. Klupp, H. Granzow, N. Osterrieder and T. C. Mettenleiter (2002). "The interacting UL31 and UL34 gene products of pseudorabies virus are involved in egress from the host-cell nucleus and represent components of primary enveloped but not mature virions." Journal of Virology **76**(1): 364-378.

- 700 Furlong, D. (1978). "Direct evidence for 6-fold symmetry of the herpesvirus hexon capsomere."  
701 Proceedings of the National Academy of Sciences of the United States of America **75**(6): 2764-  
702 2766.
- 703 Hagen, C., K. C. Dent, T. Zeev-Ben-Mordehai, M. Grange, J. B. Bosse, C. Whittle, B. G. Klupp,  
704 C. A. Siebert, D. Vasishtan, F. J. Bauerlein, J. Cheleski, S. Werner, P. Guttmann, S. Rehbein, K.  
705 Henzler, J. Demmerle, B. Adler, U. Koszinowski, L. Schermelleh, G. Schneider, L. W. Enquist,  
706 J. M. Plitzko, T. C. Mettenleiter and K. Grunewald (2015). "Structural basis of vesicle formation  
707 at the inner nuclear membrane." Cell **163**(7): 1692-1701.
- 708 Heckman, K. L. and L. R. Pease (2007). "Gene splicing and mutagenesis by PCR-driven overlap  
709 extension." Nature Protocols **2**(4): 924-932.
- 710 Heuser, J. (2005). "Deep-etch EM reveals that the early poxvirus envelope is a single membrane  
711 bilayer stabilized by a geodetic "honeycomb" surface coat." Journal of Cell Biology **169**(2): 269-  
712 283.
- 713 Hyun, J. K., C. Accurso, M. Hijnen, P. Schult, A. Pettikiriarachchi, A. K. Mitra and F. Coulibaly  
714 (2011). "Membrane remodeling by the double-barrel scaffolding protein of poxvirus." PLoS  
715 Pathogens **7**(9): e1002239.
- 716 Johnson, D. C. and J. D. Baines (2011). "Herpesviruses remodel host membranes for virus  
717 egress." Nature Reviews Microbiology **9**(5): 382-394.
- 718 Klupp, B. G., H. Granzow, G. M. Keil and T. C. Mettenleiter (2006). "The capsid-associated  
719 UL25 protein of the alphaherpesvirus pseudorabies virus is nonessential for cleavage and  
720 encapsidation of genomic DNA but is required for nuclear egress of capsids." Journal of  
721 Virology **80**(13): 6235-6246.
- 722 Klupp, B. G., H. Granzow and T. C. Mettenleiter (2011). "Nuclear envelope breakdown can  
723 substitute for primary envelopment-mediated nuclear egress of herpesviruses." Journal of  
724 Virology **85**(16): 8285-8292.
- 725 Kremer, J. R., D. N. Mastrorade and J. R. McIntosh (1996). "Computer visualization of three-  
726 dimensional image data using IMOD." Journal of Structural Biology **116**(1): 71-76.
- 727 Kuhn, J., T. Leege, B. G. Klupp, H. Granzow, W. Fuchs and T. C. Mettenleiter (2008). "Partial  
728 functional complementation of a pseudorabies virus UL25 deletion mutant by herpes simplex  
729 virus type 1 pUL25 indicates overlapping functions of alphaherpesvirus pUL25 proteins."  
730 Journal of Virology **82**(12): 5725-5734.
- 731 Liu, Y. T., J. Jiang, K. P. Bohannon, X. Dai, G. W. Gant Luxton, W. H. Hui, G. Q. Bi, G. A.  
732 Smith and Z. H. Zhou (2017). "A pUL25 dimer interfaces the pseudorabies virus capsid and  
733 tegument." Journal of General Virology **98**(11): 2837-2849.
- 734 Lorenz, M., B. Vollmer, J. D. Unsay, B. G. Klupp, A. J. Garcia-Saez, T. C. Mettenleiter and W.  
735 Antonin (2015). "A single herpesvirus protein can mediate vesicle formation in the nuclear  
736 envelope." Journal of Biological Chemistry **290**(11): 6962-6974.

- 737 Mastronarde, D. N. (2005). "Automated electron microscope tomography using robust prediction  
738 of specimen movements." Journal of Structural Biology **152**(1): 36-51.
- 739 Mettenleiter, T. C. (2016). "Vesicular Nucleo-Cytoplasmic Transport-Herpesviruses as Pioneers  
740 in Cell Biology." Viruses **8**(10).
- 741 Mettenleiter, T. C., F. Muller, H. Granzow and B. G. Klupp (2013). "The way out: what we  
742 know and do not know about herpesvirus nuclear egress." Cellular Microbiology **15**(2): 170-178.
- 743 Newcomb, W. W., J. Fontana, D. C. Winkler, N. Cheng, J. B. Heymann and A. C. Steven  
744 (2017). "The primary enveloped virion of herpes simplex virus 1: Its role in nuclear egress."  
745 MBio **8**(3).
- 746 Newcomb, W. W., F. L. Homa and J. C. Brown (2006). "Herpes simplex virus capsid structure:  
747 DNA packaging protein UL25 is located on the external surface of the capsid near the vertices."  
748 Journal of Virology **80**(13): 6286-6294.
- 749 Nicastro, D., C. Schwartz, J. Pierson, R. Gaudette, M. E. Porter and J. R. McIntosh (2006). "The  
750 molecular architecture of axonemes revealed by cryoelectron tomography." Science **313**(5789):  
751 944-948.
- 752 Reynolds, A. E., B. J. Ryckman, J. D. Baines, Y. Zhou, L. Liang and R. J. Roller (2001).  
753 "U(L)31 and U(L)34 proteins of herpes simplex virus type 1 form a complex that accumulates at  
754 the nuclear rim and is required for envelopment of nucleocapsids." Journal of Virology **75**(18):  
755 8803-8817.
- 756 Roizman, B. and D. Furlong (1974). The Replication of Herpesviruses. Comprehensive  
757 Virology. H. Fraenkel-Conrat and R. R. Wagner. Boston, MA, Springer: 229-403.
- 758 Roller, R. J. and J. D. Baines (2017). "Herpesvirus nuclear egress." Advances in Anatomy,  
759 Embryology, and Cell Biology **223**: 143-169.
- 760 Roller, R. J., S. L. Bjerke, A. C. Haugo and S. Hanson (2010). "Analysis of a charge cluster  
761 mutation of herpes simplex virus type 1 UL34 and its extragenic suppressor suggests a novel  
762 interaction between pUL34 and pUL31 that is necessary for membrane curvature around  
763 capsids." Journal of Virology **84**(8): 3921-3934.
- 764 Roller, R. J., Y. Zhou, R. Schnetzer, J. Ferguson and D. DeSalvo (2000). "Herpes simplex virus  
765 type 1 U(L)34 gene product is required for viral envelopment." Journal of virology **74**(1): 117-  
766 129.
- 767 Ronfeldt, S., B. G. Klupp, K. Franzke and T. C. Mettenleiter (2017). "Lysine 242 within helix 10  
768 of the pseudorabies virus nuclear egress complex pUL31 component is critical for primary  
769 envelopment of nucleocapsids." Journal of Virology.
- 770 Schindelin, J., C. T. Rueden, M. C. Hiner and K. W. Eliceiri (2015). "The ImageJ ecosystem: An  
771 open platform for biomedical image analysis." Molecular Reproduction and Development **82**(7-  
772 8): 518-529.

- 773 Schur, F. K., W. J. Hagen, M. Rumlova, T. Ruml, B. Muller, H. G. Krausslich and J. A. Briggs  
774 (2015). "Structure of the immature HIV-1 capsid in intact virus particles at 8.8 Å resolution."  
775 Nature **517**(7535): 505-508.
- 776 Shiba, C., T. Daikoku, F. Goshima, H. Takakuwa, Y. Yamauchi, O. Koiwai and Y. Nishiyama  
777 (2000). "The UL34 gene product of herpes simplex virus type 2 is a tail-anchored type II  
778 membrane protein that is significant for virus envelopment." Journal of General Virology **81**(Pt  
779 10): 2397-2405.
- 780 Si, Z., J. Zhang, S. Shivakoti, I. Atanasov, C. L. Tao, W. H. Hui, K. Zhou, X. Yu, W. Li, M. Luo,  
781 G. Q. Bi and Z. H. Zhou (2018). "Different functional states of fusion protein gB revealed on  
782 human cytomegalovirus by cryo electron tomography with Volta phase plate." PLoS Pathog  
783 **14**(12): e1007452.
- 784 Takeshima, K., J. Arii, Y. Maruzuru, N. Koyanagi, A. Kato and Y. Kawaguchi (2019).  
785 "Identification of the Capsid Binding Site in the Herpes Simplex Virus 1 Nuclear Egress  
786 Complex and Its Role in Viral Primary Envelopment and Replication." Journal of Virology  
787 **93**(21).
- 788 Trus, B. L., W. W. Newcomb, N. Cheng, G. Cardone, L. Marekov, F. L. Homa, J. C. Brown and  
789 A. C. Steven (2007). "Allosteric signaling and a nuclear exit strategy: binding of UL25/UL17  
790 heterodimers to DNA-Filled HSV-1 capsids." Mol Cell **26**(4): 479-489.
- 791 Yang, K. and J. D. Baines (2011). "Selection of HSV capsids for envelopment involves  
792 interaction between capsid surface components pUL31, pUL17, and pUL25." Proceedings of the  
793 National Academy of Sciences of the United States of America **108**(34): 14276-14281.
- 794 Yang, K., E. Wills, H. Y. Lim, Z. H. Zhou and J. D. Baines (2014). "Association of herpes  
795 simplex virus pUL31 with capsid vertices and components of the capsid vertex-specific  
796 complex." Journal of Virology **88**(7): 3815-3825.
- 797 Zandi, R., D. Reguera, R. F. Bruinsma, W. M. Gelbart and J. Rudnick (2004). "Origin of  
798 icosahedral symmetry in viruses." Proceedings of the National Academy of Sciences of the  
799 United States of America **101**(44): 15556-15560.

800
